# Supplementary material for: Cost-effectiveness of pessary therapy versus surgery for symptomatic pelvic organ prolapse: an economic evaluation alongside a randomised non-inferiority controlled trial
Source: PubMed Central journal article supplement (PMC11086579; doi:10.1136/bmjopen-2023-075016), 2024-05-01
Supplement: bmjopen-2023-075016supp002.pdf [file bmjopen-2023-075016supp002.pdf]

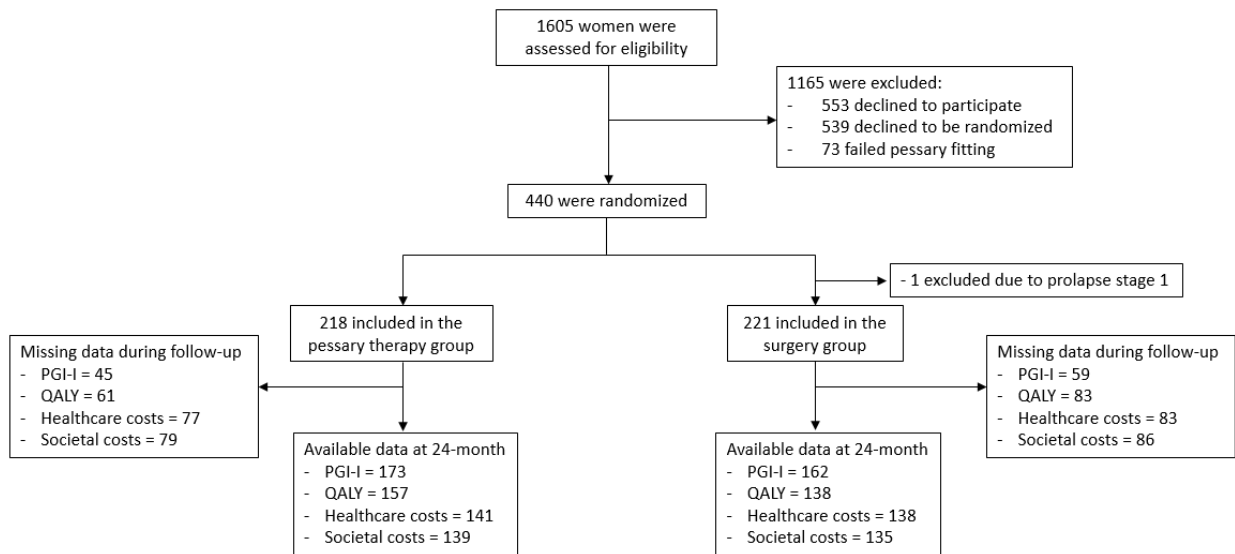

**SUPPLEMENTARY Figure 1. FLOW DIAGRAM.** Inclusion and available data at 24-month follow-up.

SUPPLEMENTARY TABLE 1. RESOURCES AND UNIT COSTS

| Resources                                                  | Unit costs | Year | Reference               |
|------------------------------------------------------------|------------|------|-------------------------|
| <b>Pessary device</b>                                      |            |      |                         |
| Milex®                                                     | €64        | 2022 | Market price: bol.com   |
| Arabin®                                                    | €73        | 2022 | Market price: bol.com   |
| Other brand (average)                                      | €68        | 2022 | Market price: bol.com   |
| Pessary placement                                          | €109       | 2022 | Dutch costing manual[1] |
| <b>Surgery</b>                                             |            |      |                         |
| Sacrospinous hysteropexy (care product 149999033)          | €5835      | 2022 | DBC[2]                  |
| Sacrospinous fixation (care product 149999047)             | €4640      | 2022 | DBC[2]                  |
| Manchester–Fothergill procedure (care product 149999047)   | €4640      | 2022 | DBC[2]                  |
| Abdominal sacrocolpopexy (care product 149999033)          | €5835      | 2022 | DBC[2]                  |
| Sacrocolpopexy care product 149999033)                     | €5835      | 2022 | DBC[2]                  |
| Vaginal hysterectomy (care product 149999047)              | €4640      | 2022 | DBC[2]                  |
| Average surgical procedures costs (used as WTP threshold)  | €5237      | 2022 | DBC[2]                  |
| <b>Other resources</b>                                     |            |      |                         |
| General practitioner consultation                          | €39        | 2022 | Dutch costing manual[1] |
| Other healthcare professional consultation at primary care | €39        | 2022 | Dutch costing manual[1] |
| Medical specialist consultation at secondary care          | €109       | 2022 | Dutch costing manual[1] |
| Hospital readmission (1 day)                               | €568       | 2022 | Dutch costing manual[1] |
| Paid working hour for women                                | €38        | 2022 | Dutch costing manual[1] |

DBC: Diagnosis Treatment Combination, in Dutch *Diagnose Behandelings Combinatie*.

References:

1 Kanters TA, Bouwmans CAM, van der Linden N, *et al.* Update of the Dutch manual for costing studies in health care. *PLoS One* 2017;**12**. doi:10.1371/journal.pone.0187477

2 Diagnose Behandelings Combinatie (DBC) open data - Nza. <https://www.opendisdata.nl/> (accessed 3 Sep 2022).
